# Supplementary material for: Hematopoietic stem cells are acutely sensitive to Acd shelterin gene inactivation
Source: JCI journal article supplement (doi:10.1172/jci67871), 2013-12-08
Supplement: sd1 [file 1]

## Supplemental material

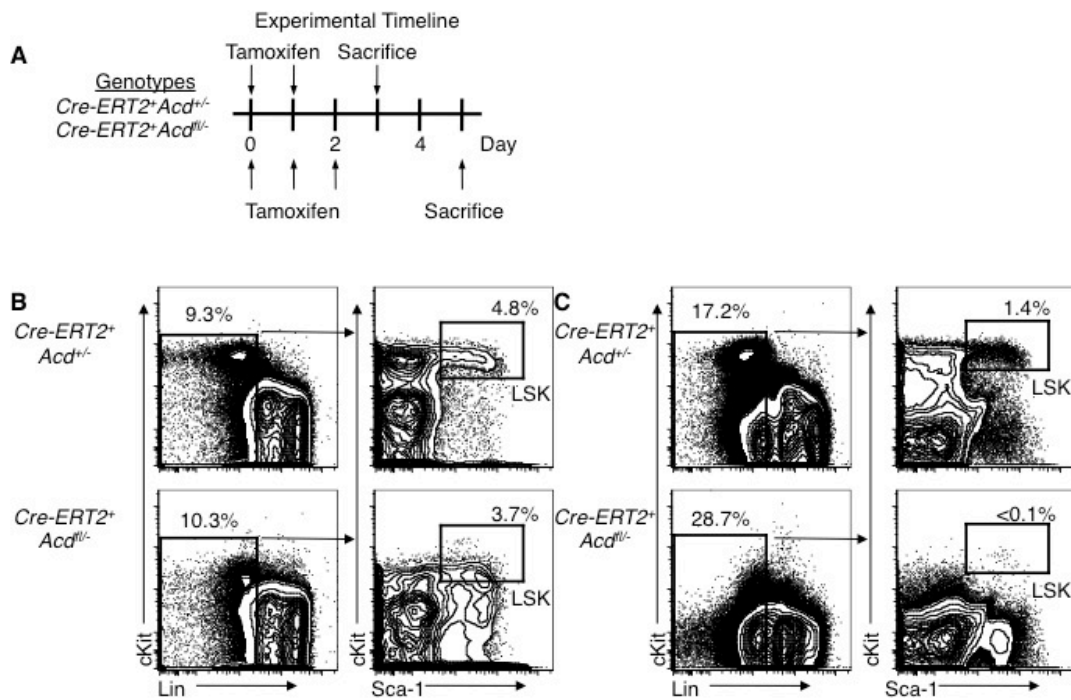

**Figure S1. *Acd/Tpp1* inactivation with tamoxifen-inducible Cre recombinase results in rapid depletion of hematopoietic stem and progenitor cells.**

(A) Experimental design: tamoxifen was administered to control  $Cre-ERT2^+ x Acid^{+/-}$  or  $Cre-ERT2^+ x Acid^{fl/-}$  mice (1 mg i.p. daily day 1-3). The  $Cre-ERT2$  lentitransgene encodes the ubiquitously expressed Tamoxifen-inducible Cre-ERT2 recombinase; (B-C) Flow cytometric analysis of bone marrow at day 3 (B) or day 5 (C) after initiation of tamoxifen. In  $Cre-ERT2^+ x Acid^{fl/-}$  mice, the Lineage<sup>-</sup>Sca-1<sup>+</sup>cKit<sup>hi</sup> (LSK) compartment (containing hematopoietic stem and progenitor cells) became abnormal within 3 days of tamoxifen administration and was severely depleted within 5 days. Representative flow cytometry plots are shown. Numbers indicate the percentage of cells in each gate.

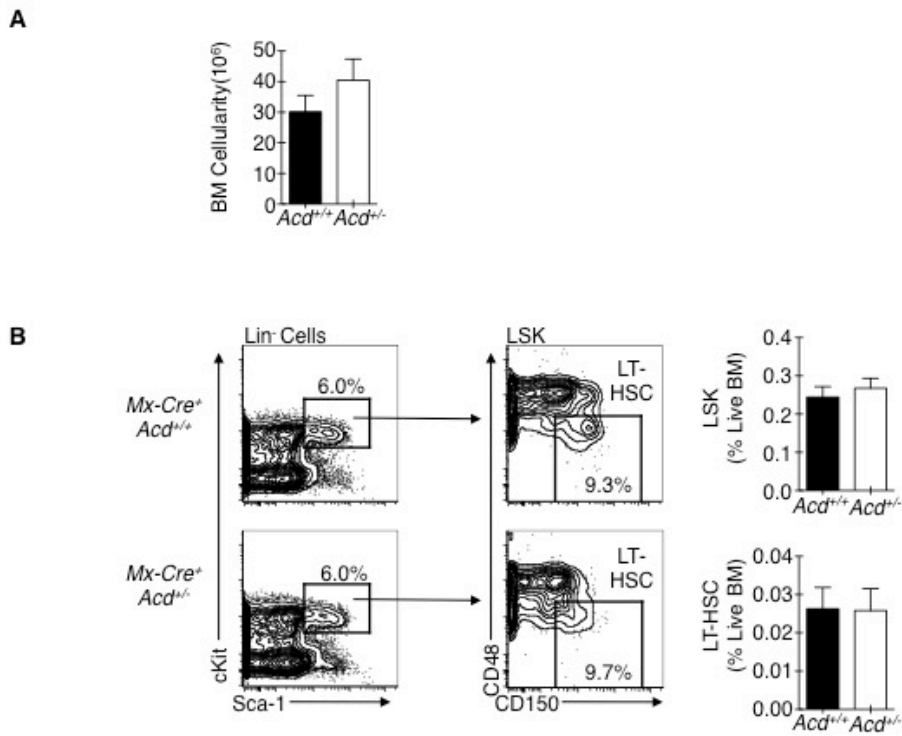

**Figure S2. Heterozygosity for the *Acd/Tip1* null allele does not reveal haploinsufficiency.**

(**A**) Bone marrow cellularity of wild-type mice compared to *Acd*<sup>+/-</sup> mice; (**B**) Analysis of the Lin<sup>-</sup>Sca-1<sup>hi</sup>c-Kit<sup>hi</sup> LSK and CD150<sup>+</sup>CD48<sup>-</sup>Lin<sup>-</sup>Sca-1<sup>hi</sup>c-Kit<sup>hi</sup> long-term HSC (LT-HSC) compartments demonstrating no differences in the frequency of either population in wild-type compared to *Acd*<sup>+/-</sup> mice (n=4 mice/group, data shown as mean ± SEM). Representative flow cytometry plots are shown. Numbers indicate the percentage of cells in each gate.

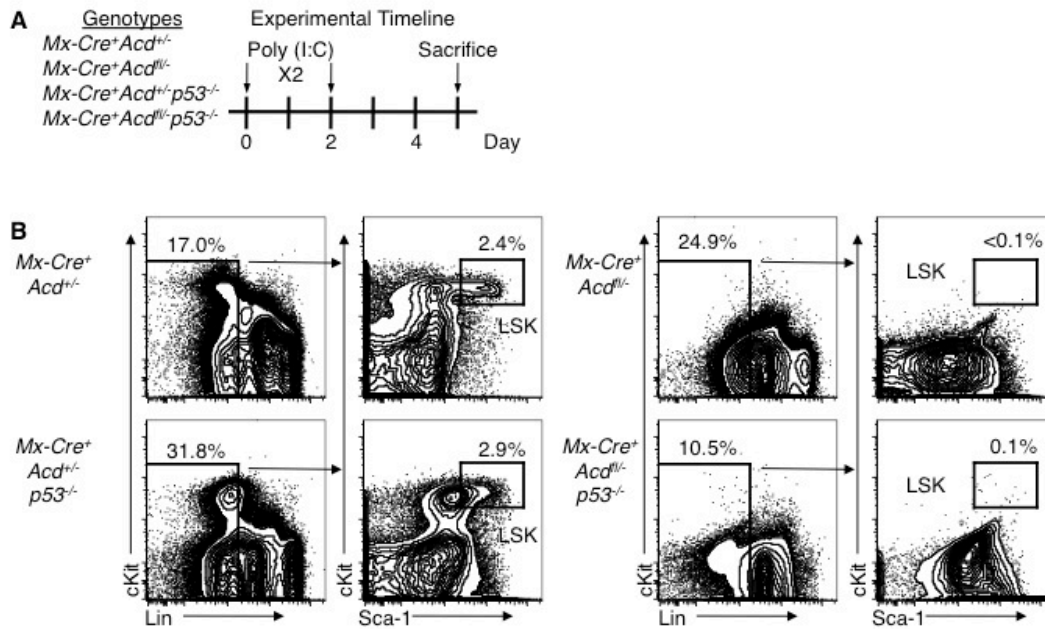

**Figure S3. *p53* inactivation does not rescue *Acd/Tpp1*-deficient hematopoietic stem and progenitor cells from acute depletion.**

(A) Experimental design: lethally irradiated B6-CD45.1 mice were transplanted with bone marrow from *Mx-Cre<sup>+</sup>Acd<sup>+/-</sup>p53<sup>+/+</sup>*, *Mx-Cre<sup>+</sup>Acd<sup>+/-</sup>p53<sup>-/-</sup>*, *Mx-Cre<sup>+</sup>Acd<sup>fl/-</sup>p53<sup>+/+</sup>* or *Mx-Cre<sup>+</sup>Acd<sup>fl/-</sup>p53<sup>-/-</sup>* B6-CD45.2 and wild-type (WT) B6-CD45.1 competitor mice ( $10^6$  cells each). After 6 weeks to allow hematopoietic reconstitution, poly(I:C) was administered; (B) Flow cytometric analysis of bone marrow 5 days after starting poly(I:C) injection, demonstrating an acute depletion of Lineage<sup>-</sup>Sca-1<sup>+</sup>cKit<sup>hi</sup> (LSK) hematopoietic progenitors in both *Mx-Cre<sup>+</sup>Acd<sup>fl/-</sup>p53<sup>+/+</sup>* and *Mx-Cre<sup>+</sup>Acd<sup>fl/-</sup>p53<sup>-/-</sup>* recipients (right panels). Representative flow cytometry plots are shown. Numbers indicate the percentage of cells in each gate.
